# Supplementary material for: Balancing GRK2 and EPAC1 levels prevents and relieves chronic pain
Source: JCI journal article supplement (doi:10.1172/jci66241), 2013-11-14
Supplement: sd1 [file 1]

## Supplemental Figures

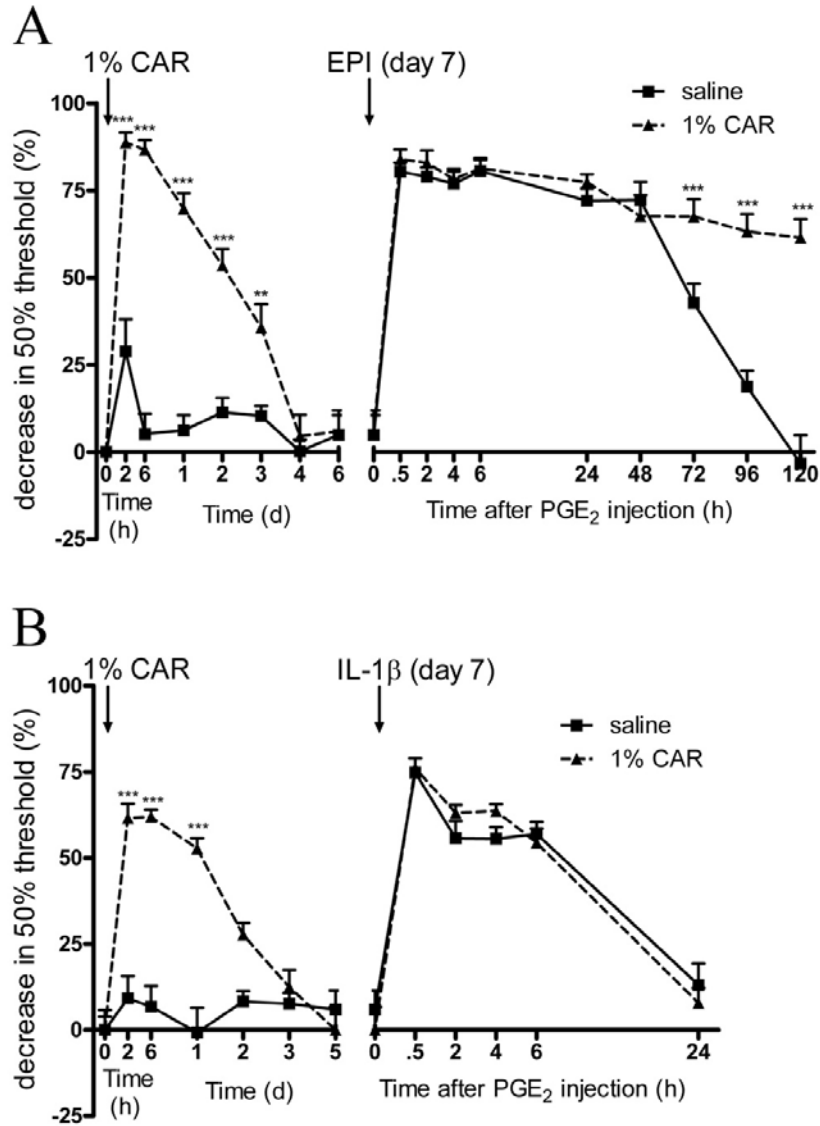

**Figure S1.** 7 days after carrageenan (CAR)- or saline pretreatment, mice received an intraplantar injection of (A) EPI (10 ng/paw) or (B) IL-1 $\beta$  (1 ng/paw). The changes in 50% paw withdrawal threshold were monitored over time. Data are expressed as mean  $\pm$  SEM. n=8/group, \*\*  $P < 0.01$ , \*\*\*  $P < 0.001$

Lumbar DRG (day 3 after CAR)

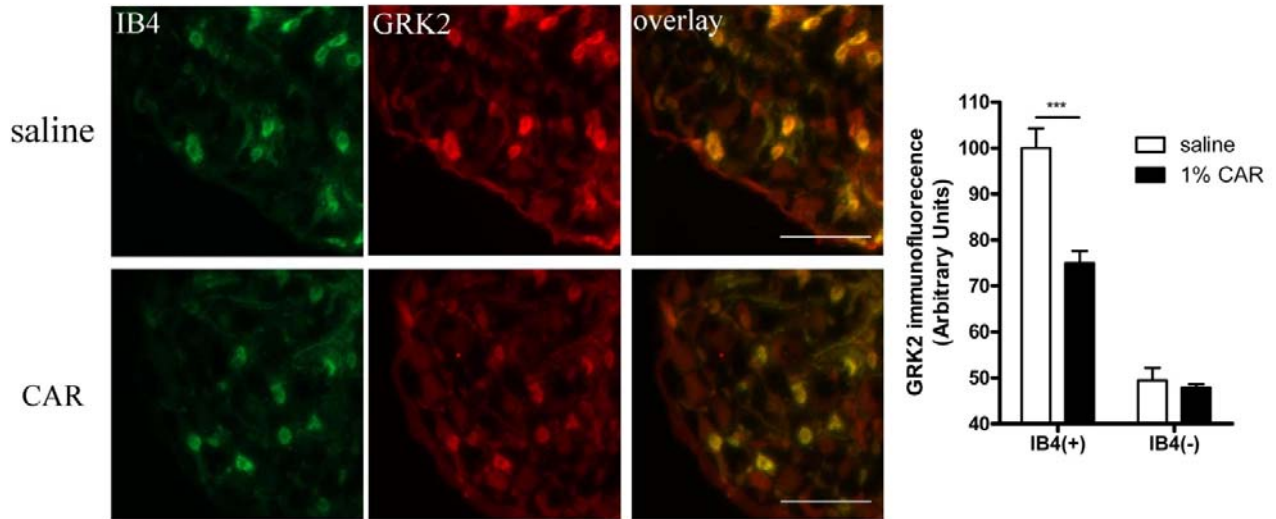

**Figure S2.** (A) Representative pictures of IB4 (green) and GRK2 (red) double staining of lumbar DRG from saline and carrageenan (CAR)-treated mice and bar graphs representing average GRK2 immunofluorescence intensity in lumbar DRG at 3 days after intraplantar carrageenan or saline. Scale bar: 100  $\mu$ m. Data are expressed as mean  $\pm$  SEM of 4 mice per group and are based on  $\sim$ 300 small diameter neurons from the L3-L5 DRG per mouse. \*\*\*  $p < 0.001$ .

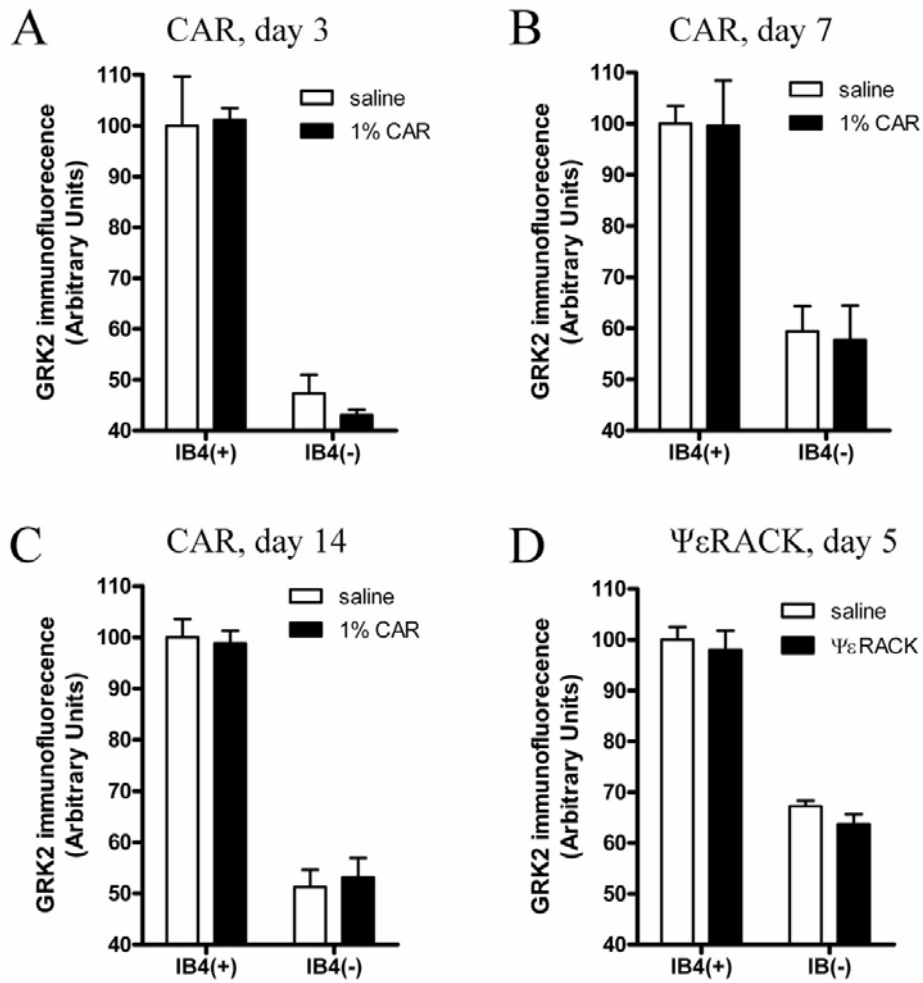

**Figure S3.** Bar graphs representing the mean GRK2 immunofluorescence intensity in thoracic DRG at (A) 3, (B) 7, (C) 14 days after intraplantar carrageenan (CAR) or 5 days after  $\Psi\epsilon$ RACK (D), or saline. Data are expressed as mean  $\pm$  SEM of 4 mice per group and are based on  $\sim$ 300 small diameter neurons from T6-T10 DRG per mouse.

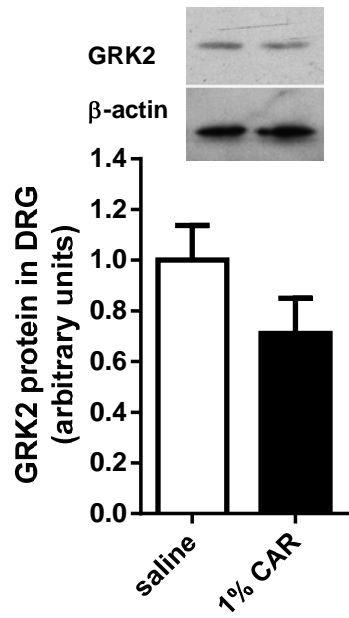

**Figure S4.** Western blot analysis of GRK2 protein levels. Homogenates of DRG obtained at day 7 after carrageenan were analyzed for GRK2. Data are expressed as mean  $\pm$  SEM of 4 mice per group;  $p=0.19$

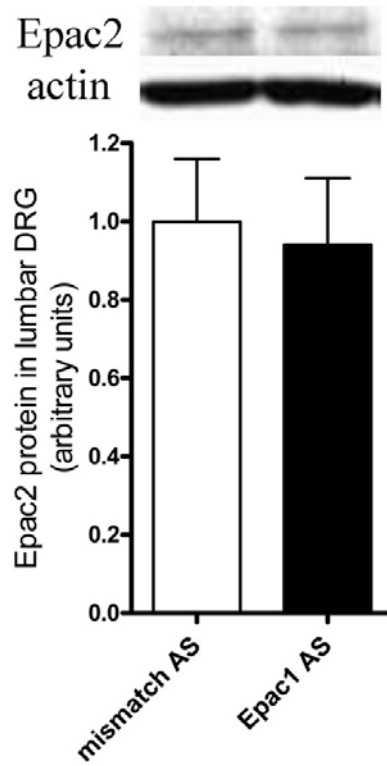

**Figure S5.** Epac2 protein levels in mice 1 day after last Epac1 antisense ODN treatment. Data are expressed as mean  $\pm$  SEM. n=4/group. (AS: antisense ODN)

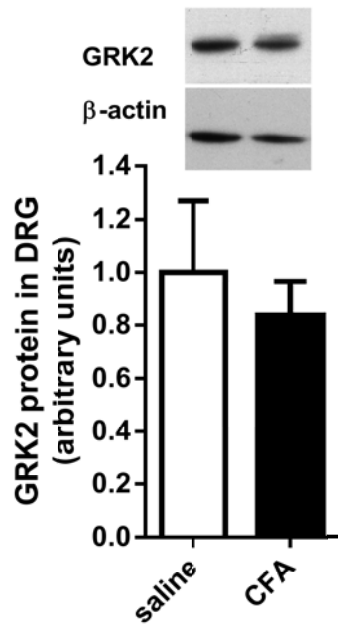

**Figure S6.** Western blot analysis of GRK2 protein levels. Homogenates of DRG obtained at day 5 after intraplantar CFA were analyzed for GRK2. Data are expressed as mean  $\pm$  SEM of 4 mice per group;  $p=0.60$
